# Supplementary material
Source: PubMed Central journal article supplement (PMC3416381)

## Supplementary material

TABLE S1. Taxonomic characterization of banana-associated strains based on partial 16S rRNA/ITS gene sequences obtained from SSCP gels

| Band No. | Closet database match                    | Identity | Accession No. | Taxonomic affiliation |
|----------|------------------------------------------|----------|---------------|-----------------------|
| 1.1      | <i>Flavobacterium micromati</i>          | 97%      | NR_029010.1   | Flavobacteria         |
| 2.1      | <i>Delftia tsuruhatensis</i>             | 99%      | NR_024786     | Betaroteobacteria     |
| 3.1      | <i>Buttiauxella warmboldiae</i>          | 99%      | NR_028893     | Gammaproteobacteria   |
| 3.2      | <i>Brevundimonas nasdae</i>              | 99%      | NR_028633     | Alphaproteobacteria   |
| 4.1      | <i>Herbaspirillum seropedicae</i>        | 98%      | NR_02932      | Betaroteobacteria     |
| 4.2      | <i>Serratia fonticola</i>                | 98%      | NR_025339     | Gammaproteobacteria   |
| 6.1      | <i>Acidovorax temperans</i>              | 99%      | NR_028715     | Betaroteobacteria     |
| 7.1      | <i>Delftia tsuruhatensis</i>             | 98%      | NR_024786     | Betaroteobacteria     |
| 7.2      | <i>Azoarcus communis</i>                 | 93%      | NR_024850     | Betaroteobacteria     |
| 7.3.     | <i>Flavobacterium frigoris</i>           | 96%      | NR_025597     | Flavobacteria         |
| 7.4      | <i>Brevundimonas nasdae</i>              | 99%      | NR_028633     | Alphaproteobacteria   |
| 8.1      | <i>Flavobacterium micromati</i>          | 95%      | NR_029010     | Flavobacteria         |
| 10.1     | <i>Flavobacterium xinjiangense</i>       | 96%      | NR_025201     | Flavobacteria         |
| 10.2     | <i>Brevundimonas nasdae</i>              | 98%      | NR_028633     | Alphaproteobacteria   |
| 11.1     | <i>Herbaspirillum seropedicae</i>        | 98%      | NR_029329     | Betaroteobacteria     |
| 12.1     | <i>Pseudomonas cichorii</i>              | 98%      | NR_026532     | Gammaproteobacteria   |
| 13.1     | <i>Flavobacterium frigoris</i>           | 94%      | NR_025597     | Flavobacteria         |
| 13.2     | <i>Flavobacterium micromati</i>          | 96%      | NR_029010     | Flavobacteria         |
| 14.1     | <i>Diaphorobacter nitroreducens</i>      | 98%      | NR_024782     | Betaroteobacteria     |
| 14.2     | <i>Shingobacterium faecium</i>           | 93%      | NR_025537     | Sphingobacteria       |
| 15.1     | <i>Flavobacterium frigidarium</i>        | 95%      | NR_025020     | Flavobacteria         |
| 16.1     | <i>Delftia tsuruhatensis</i>             | 99%      | NR_024786     | Betaroteobacteria     |
| R1.1     | <i>Lepista sordida</i>                   | 77%      | FJ770391.1    | Basidiomycota         |
| R4.1     | <i>Tulostoma melanocyclum</i>            | 80%      | EU784436.1    | Basidiomycota         |
| R4.2     | <i>Geastrum corollinum</i>               | 92%      | EU784222.1    | Basidiomycota         |
| R5.1     | <i>Macrolepiota clelandii</i>            | 80%      | AY083203.1    | Basidiomycota         |
| R6.1     | <i>Pluteus albostipitatus</i>            | 96%      | HM562106.1    | Basidiomycota         |
| R7.2     | <i>Geastrum corollinum</i>               | 88%      | EU784222.1    | Basidiomycota         |
| R8.1     | <i>Ampulloclitocybe clavipes</i>         | 87%      | AB301607.1    | Basidiomycota         |
| R9.1     | <i>Macrolepiota clelandii</i>            | 79%      | AY083203.1    | Basidiomycota         |
| R11.1    | <i>Agaricus bisporus</i>                 | 90%      | HM561978.1    | Basidiomycota         |
| R13.1    | <i>Hyphodontia nothofagi</i>             | 94%      | GQ411524.1    | Basidiomycota         |
| E2.1     | <i>Coprinus fissolanatus</i>             | 96%      | AF345812.1    | Basidiomycota         |
| E2.2     | <i>Bullera oryzae</i>                    | 99%      | AF444413.1    | Basidiomycota         |
| E5.1     | <i>Musa acuminata x Musa schizocarpa</i> | 98%      | FR727963.1    | Plant DNA             |
| E5.2     | <i>Cryptococcus zaeae</i>                | 97%      | AJ965481.1    | Basidiomycota         |
| E8.1     | <i>Hypochnicium vellereum</i>            | 82%      | AY787674.2    | Basidiomycota         |

TABLE S2. Bacterial isolates with the highest antagonistic activity: origin, activity and identity

| No. | Isolat No. | Origin <sup>a</sup> | Antagonistic activity <sup>b</sup> |              |              | Identification |                                    |            |               |
|-----|------------|---------------------|------------------------------------|--------------|--------------|----------------|------------------------------------|------------|---------------|
|     |            |                     | <i>C. m.</i>                       | <i>F. c.</i> | <i>F. o.</i> | ARDRA group    | Species                            | Similarity | Accession No. |
| 1   | R1R2A2.3   | R: 1                | ++                                 | +            | ++           | 1              |                                    |            |               |
| 2   | S3MC4.4    | S: 3a               | +++                                | ++           | -            | 1              | <i>Burkholderia multivorans</i>    | 99%        | NR_029358.1   |
| 3   | S3MC4.7    | S: 3a               | ++                                 | ++           | ++           | 1              | <i>B. cepacia</i>                  | 99%        | NR_029209.1   |
| 4   | E1SNA2.9   | E: 1                | +++                                | +++          | ++           | 1              | <i>B. plantarii</i>                | 99%        | NR_037064.1   |
| 5   | E1SNA2.12  | E: 1                | +++                                | +++          | ++           | 1              |                                    |            |               |
| 6   | E1SNA2.13  | E: 1                | +++                                | +++          | ++           | 1              |                                    |            |               |
| 7   | E1SNA2.14  | E: 1                | +++                                | +++          | ++           | 1              |                                    |            |               |
| 8   | E3KB1.6    | E: 3a               | +                                  | +            | -            | 2              | <i>Serratia marcescens</i>         | 99%        | NR_036886.1   |
| 9   | S2MC1.5    | S: 2                | +++                                | +            | -            | 2              | <i>S. marcescens</i>               | 99%        | NR_036886.1   |
| 10  | S4MC4.2    | S: 3b               | ++                                 | +            | -            | 2              |                                    |            |               |
| 11  | S4MC4.3    | S: 3b               | +                                  | +            | -            | 2              | <i>S. marcescens</i>               | 99%        | NR_036886.1   |
| 12  | S4KB1.8    | S: 3b               | +                                  | +            | -            | 2              | <i>S. marcescens</i>               | 99%        | NR_036886.1   |
| 13  | S2R2A2.5   | S: 2                | +                                  | +            | -            | 2              |                                    |            |               |
| 14  | S3R2A1.6   | S: 3a               | +                                  | +            | -            | 2              | <i>S. marcescens</i>               | 100%       | NR_036886.1   |
| 15  | R1KB1.8    | R: 1                | ++                                 | +            | +            | 3              | <i>Pseudomonas fluorescens</i>     | 99%        | DQ073039.1    |
| 16  | R1KB2.1    | R: 1                | +                                  | +            | +            | 3              | <i>P. putida</i>                   | 94%        | HQ259593.1    |
| 17  | R1KB2.3    | R: 1                | +                                  | +            | -            | 3              |                                    |            |               |
| 18  | R4KB1.1    | R: 3b               | +++                                | ++           | +            | 3              | <i>P. cichorii</i>                 | 98%        | NR_026532.1   |
| 19  | R4KB3.1    | R: 3b               | ++                                 | +            | -            | 3              |                                    |            |               |
| 20  | E1MC1.8    | E: 1                | +                                  | +            | -            | 3              |                                    |            |               |
| 21  | E1MC2.1    | E: 1                | +++                                | +            | -            | 3              |                                    |            |               |
| 22  | E1MC2.7    | E: 1                | +++                                | ++           | -            | 3              |                                    |            |               |
| 23  | E1KB2.1    | E: 1                | +++                                | ++           | ++           | 3              | <i>P. palleroniana</i>             | 99%        | NR_029050.1   |
| 24  | E1KB2.5    | E: 1                | +++                                | ++           | ++           | 3              | <i>P. palleroniana</i>             | 99%        | NR_029050.1   |
| 25  | E1KB2.8    | E: 1                | +                                  | ++           | ++           | 3              | <i>P. palleroniana</i>             | 99%        | NR_029050.1   |
| 26  | E2KB1.7    | E: 2                | +                                  | +            | -            | 3              |                                    |            |               |
| 27  | S2MC2.5    | S: 2                | +++                                | ++           | ++           | 3              | <i>P. putida</i>                   | 99%        | HM439953.1    |
| 28  | R3MC3.6    | R: 3a               | ++                                 | ++           | +            | 4              |                                    |            |               |
| 29  | R3R2A4.6   | R: 3a               | ++                                 | ++           | -            | 4              |                                    |            |               |
| 30  | R4R2A1.6   | R: 3b               | +                                  | +            | ++           | 4              |                                    |            |               |
| 31  | S1R2A1.2   | S: 1                | +                                  | +            | +            | 4              |                                    |            |               |
| 32  | S1R2A2.2   | S: 1                | +                                  | +            | -            | 4              |                                    |            |               |
| 33  | S1R2A2.5   | S: 1                | +                                  | +            | -            | 4              |                                    |            |               |
| 34  | S2R2A3.7   | S: 2                | +                                  | +            | -            | 4              | <i>Bacillus weihenstephanensis</i> | 98%        | NR_024697     |
| 35  | S2R2A4.4   | S: 2                | +                                  | +            | +            | 4              |                                    |            |               |
| 36  | S4R2A4.6   | S: 3b               | +                                  | +            | +            | 4              |                                    |            |               |
| 37  | S3R2A4.4   | S: 3a               | +                                  | +            | -            | 5              | <i>Bacillus indicus</i>            | 96%        | NR_029022.1   |

<sup>a</sup> S=soil, R=rhizosphere and E=endosphere

<sup>b</sup> *C.m* =*Colletotrichum musae*, *F.c* =*Fusarium chlamydosporum*, *F.o* =*Fusarium oxysporum*

TABLE S3. Fungal isolates with the highest antagonistic activity: origin, activity and identity

| No. | Isolat No. | Origin <sup>a</sup> | Antagonistic activity <sup>b</sup> |       |       | ARDRA group | Identification |                                   | Accession No. |
|-----|------------|---------------------|------------------------------------|-------|-------|-------------|----------------|-----------------------------------|---------------|
|     |            |                     | C. m.                              | F. c. | F. o. |             | Species        | Similarity                        |               |
| 1   | R3SNA4.1   | R: 3a               | +                                  | +     | -     | 1           |                | <i>Penicillium janthinellum</i>   | 97%           |
| 2   | R3SNA4.3   | R: 3a               | +                                  | +     | -     | 1           | 1              | <i>Penicillium janthinellum</i>   | 99%           |
| 3   | R4SNA1.10  | R: 3b               | ++                                 | +     | +     | 2           | 1              | <i>Penicillium phialosporum</i>   | 87%           |
| 4   | R4SNA1.11  | R: 3b               | ++                                 | +     | -     | 2           | 1              | <i>Penicillium brevicompactum</i> | 99%           |
| 5   | R4SNA1.14  | R: 3b               | ++                                 | +     | -     | 2           | 1              | <i>Penicillium brevicompactum</i> | 99%           |
| 6   | S3SNA1.5   | S: 3a               | +                                  | +     | -     | 3           | 1              | <i>Penicillium</i> sp.            | 99%           |
| 7   | S3SNA2.1   | S: 3a               | +                                  | +     | -     | 3           | 1              | -                                 |               |
| 8   | S3SNA4.7   | S: 3a               | +                                  | +     | -     | 3           | n.d.           | <i>Penicillium</i> sp.            | 99%           |
| 9   | R2SNA1.12  | R: 2                | +                                  | +     | -     | 3           | n.d.           | <i>Penicillium brevicompactum</i> | 94%           |
| 10  | S1SNA1.9   | S: 1                | +                                  | +     | -     | 4           | n.d.           | <i>Mortierella</i> sp.            | 99%           |
| 11  | S1SNA1.12  | S: 1                | +                                  | +     | -     | 4           | 2              | <i>Mortierella</i> sp.            | 99%           |
| 12  | R4SNA4.10  | R: 3b               | +                                  | +     | -     | 4           | 2              | <i>Mortierella</i> sp.            | 99%           |
| 13  | S3SNA2.2   | S: 3a               | +                                  | +     | +     | 5           | 2              | <i>Penicillium</i> sp.            | 99%           |
| 14  | S3SNA4.8   | S: 3a               | +                                  | +     | -     | 5           | 1              | <i>Penicillium</i> sp.            | 100%          |
| 15  | S3SNA1.4   | S: 3a               | ++                                 | +     | -     | 6           | 1              | <i>Penicillium</i> sp.            | 98%           |
| 16  | S3SNA2.5   | S: 3a               | +                                  | +     | -     | 6           | 3              | <i>Penicillium chrysogenum</i>    | 98%           |
| 17  | S1SNA1.2   | S: 1                | ++                                 | +     | -     | 7           | 3              | <i>Fusarium solani</i>            | 99%           |
| 18  | S1SNA3.1   | S: 1                | +++                                | +     | -     | 8           | 4              | <i>Penicillium coprobium</i>      | 100%          |
| 19  | S2SNA1.7   | S: 1                | ++                                 | +     | +     | 9           | 3              | <i>Fusarium</i> sp.               | 99%           |
| 20  | S2SNA2.3   | S: 2                | ++                                 | +     | -     | 10          | 4              | -                                 |               |
| 21  | S2SNA4.14  | S: 2                | ++                                 | +     | -     | 11          | 5              | <i>Bionectria pityrodes</i>       | 99%           |
| 22  | S3SNA1.6   | S: 3a               | +                                  | +     | +     | 12          | 5              | -                                 |               |
| 23  | S4SNA3.3   | S: 3b               | +                                  | +     | ++    | 13          | n.d.           | -                                 |               |
| 24  | S1TSM3.3   | S: 1                | ++                                 | +     | ++    | 14          | 4              | <i>Hypocrea lixi</i>              | 99%           |
| 25  | R2SNA3.11  | R: 2                | +                                  | +     | -     | 15          | 6              | <i>Paecilomyces lilacinus</i>     | 100%          |
| 26  | R2SNA4.3   | R: 2                | +                                  | +     | +     | 16          | 5              | <i>Paecilomyces lilacinus</i>     | 100%          |
| 27  | R3SNA1.4   | R: 3a               | ++                                 | +     | -     | 17          | 5              | <i>Penicillium</i> sp.            | 99%           |
| 28  | R3SNA1.9   | R: 3a               | ++                                 | +     | -     | 18          | 1              | <i>Penicillium</i> sp.            | 99%           |
| 29  | R3SNA2.1   | R: 3a               | ++                                 | +     | +     | 19          | 1              | <i>Fusarium</i> sp.               | 99%           |
| 30  | R3SNA3.5   | R: 3a               | +                                  | +     | -     | 20          | 4              | <i>Paecilomyces marquandii</i>    | 99%           |
| 31  | R4SNA1.12  | R: 3b               | ++                                 | +     | -     | 21          | 7              | <i>Penicillium brevicompactum</i> | 100%          |
| 32  | R4SNA4.2   | R: 3b               | ++                                 | +     | -     | 22          | 3              | <i>Penicillium</i>                | 99%           |

|    |           |      |     |    |    |    |      |                                                  |     |
|----|-----------|------|-----|----|----|----|------|--------------------------------------------------|-----|
| 33 | E1SNA4.5  | E: 1 | ++  | +  | +  | 23 | 8    | <i>janthinellum</i><br><i>Fusarium oxysporum</i> | 99% |
| 34 | E1SNA4.18 | E: 1 | +   | +  | -  | 24 | 9    | <i>Penicillium</i> sp.                           | 99% |
| 35 | E2SNA1.6  | E: 2 | +   | +  | -  | 25 | n.d. | <i>Paecilomyces lilacinus</i>                    | 99% |
| 36 | E2SNA3.14 | E: 2 | +++ | ++ | ++ | 26 | 5    | <i>Faurelina elongata</i>                        | 99% |

<sup>a</sup> S=soil, R=rhizosphere and E=endosphere

<sup>b</sup> *C.m* =*Colletotrichum musae*, *F.c* =*Fusarium chlamydosporum*, *F.o* =*Fusarium oxysporum*

**Fig. S1.** Bacterial abundances presented as  $\log_{10} \text{g}^{-1}$  values per gram fresh weight for rhizosphere (R), endosphere (E) and soil (S) determined on A) R2A medium, B) King's B medium C) MacConkey medium and, D) fungal abundances on SNA medium from the different field sites: 1: Field 1 no herbicide treatment, 2: Field 2 intensive herbicide treatment, 3a: Field 3a no herbicide treatment, agro-forest, 3b: Field 3b no herbicide treatment, no agro-forest. Bars represent confidence intervals at  $P=0.05$ .

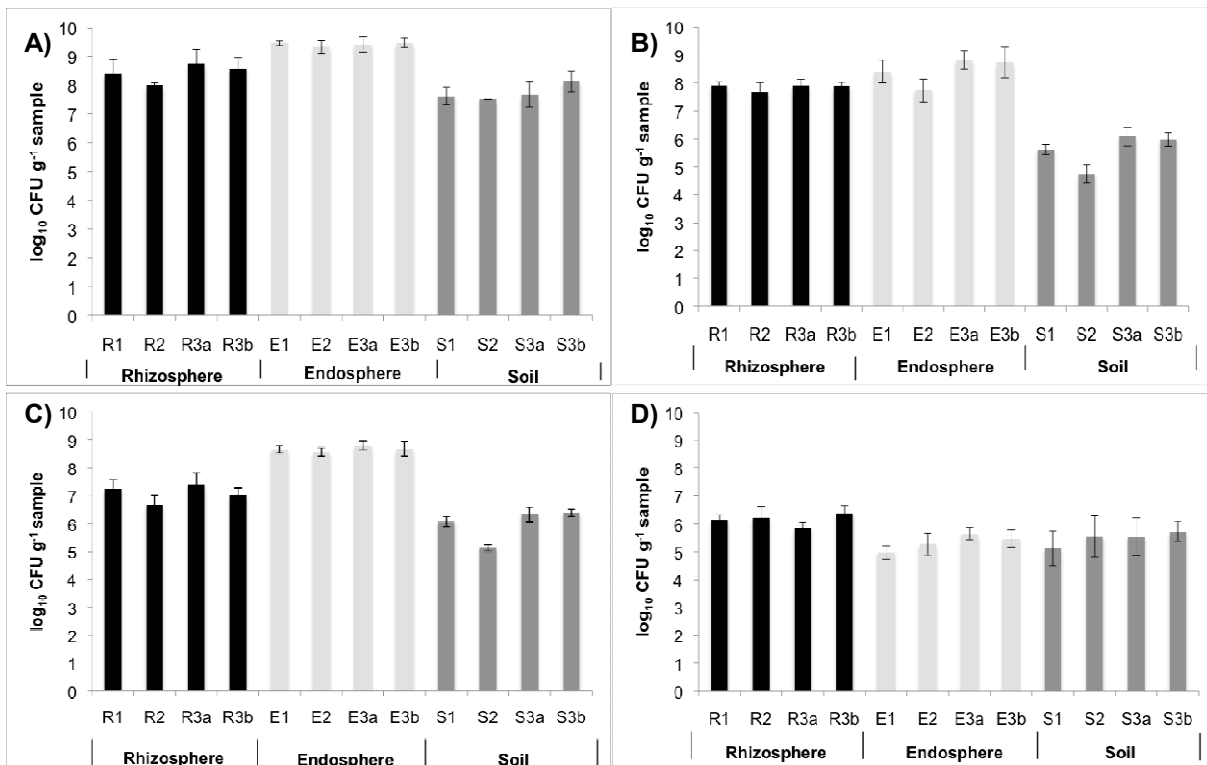

**Fig. S2.** Rarefaction curves obtained for enterics by amplicon sequencing for the rhizosphere (rhizo, 3a: no herbicide treatment, agro-forest, 3b: no herbicide treatment), the endosphere (endo) and soil.

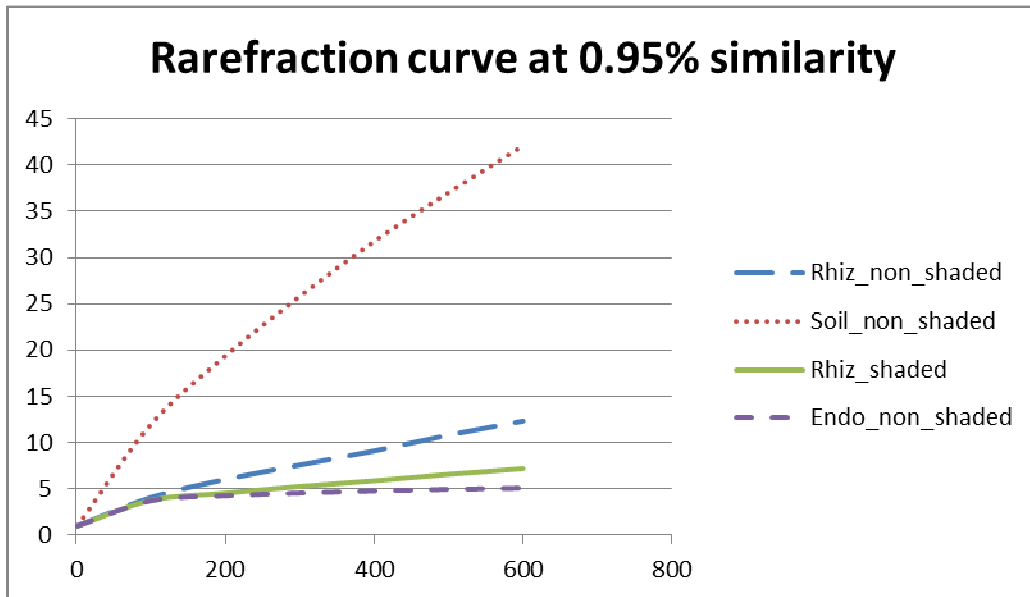

Supplement: supp_78.14.4933_AEM00772-12_supplemental.pdf [file supp_78.14.4933_AEM00772-12_supplemental.pdf]
